# Supplementary material for: Cerebellar transcranial current stimulation – An intraindividual comparison of different techniques
Source: PubMed Central journal article supplement (PMC9521312; doi:10.3389/fnins.2022.987472), 2022-09-15
Supplement: Image_2.pdf [file Image_2.pdf]

Supplementary Figure 2

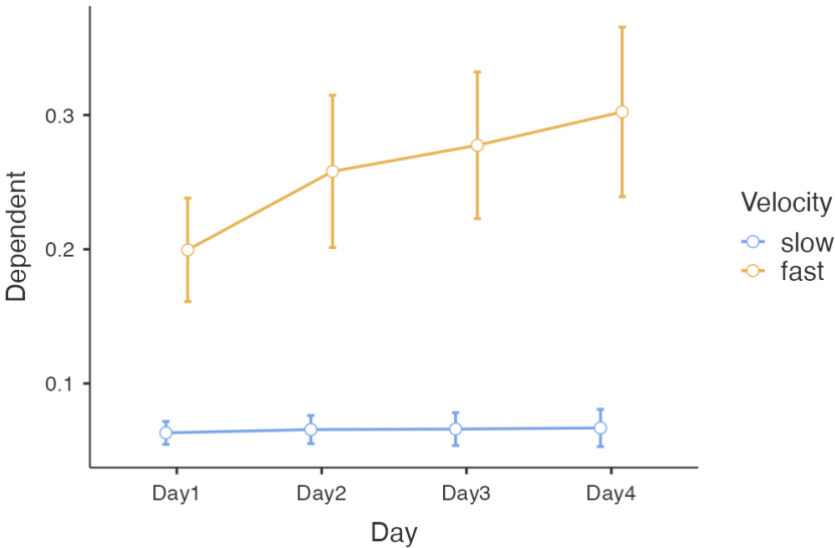

The effects of the ANOVA on the pre-interventional data (standard deviation of movement trajectories) for the slow and fast conditions are displayed.
