# Supplementary material for: Cerebellar transcranial current stimulation – An intraindividual comparison of different techniques
Source: PubMed Central journal article supplement (PMC9521312; doi:10.3389/fnins.2022.987472), 2022-09-15
Supplement: Table_1.pdf [file Table_1.pdf]

**Supplementary Table 1** TMS thresholds and test pulse intensities

|                                                        | <i>sham</i>      | <i>tACS</i>      | <i>tRNS</i>      | <i>tDCS</i>      |
|--------------------------------------------------------|------------------|------------------|------------------|------------------|
| <b>RMT, MSO (<math>\pm</math> SEM)</b>                 |                  |                  |                  |                  |
| Pre                                                    | 38 ( $\pm$ 1.81) | 38 ( $\pm$ 1.71) | 37 ( $\pm$ 1.55) | 38 ( $\pm$ 1.56) |
| Post1                                                  | 38 ( $\pm$ 1.81) | 37 ( $\pm$ 1.54) | 37 ( $\pm$ 1.49) | 37 ( $\pm$ 1.56) |
| Post2                                                  | 38 ( $\pm$ 1.75) | 38 ( $\pm$ 1.67) | 37 ( $\pm$ 1.47) | 38 ( $\pm$ 1.57) |
| Post3                                                  | 38 ( $\pm$ 1.73) | 38 ( $\pm$ 1.52) | 38 ( $\pm$ 1.56) | 38 ( $\pm$ 1.55) |
| <b>AMT, MSO (<math>\pm</math> SEM)</b>                 |                  |                  |                  |                  |
| Pre                                                    | 31 ( $\pm$ 1.26) | 31 ( $\pm$ 1.37) | 30 ( $\pm$ 1.38) | 30 ( $\pm$ 1.27) |
| Post1                                                  | 31 ( $\pm$ 1.34) | 29 ( $\pm$ 1.14) | 30 ( $\pm$ 1.44) | 31 ( $\pm$ 1.36) |
| Post2                                                  | 32 ( $\pm$ 1.28) | 30 ( $\pm$ 1.22) | 31 ( $\pm$ 1.40) | 31 ( $\pm$ 1.35) |
| Post3                                                  | 32 ( $\pm$ 1.32) | 31 ( $\pm$ 1.28) | 31 ( $\pm$ 1.44) | 31 ( $\pm$ 1.39) |
| <b>TS (MEP), MSO (<math>\pm</math> SEM)</b>            | 63 ( $\pm$ 3.81) | 62 ( $\pm$ 3.56) | 61 ( $\pm$ 3.53) | 60 ( $\pm$ 3.32) |
| <b>TS (SICI, CBI, SAI), MSO (<math>\pm</math> SEM)</b> |                  |                  |                  |                  |
| Pre                                                    | 62 ( $\pm$ 3.94) | 62 ( $\pm$ 3.57) | 60 ( $\pm$ 3.49) | 60 ( $\pm$ 3.55) |
| Post1                                                  | 62 ( $\pm$ 3.81) | 57 ( $\pm$ 3.97) | 59 ( $\pm$ 3.45) | 59 ( $\pm$ 3.63) |
| Post2                                                  | 63 ( $\pm$ 3.77) | 60 ( $\pm$ 3.37) | 59 ( $\pm$ 3.38) | 60 ( $\pm$ 3.55) |
| Post3                                                  | 62 ( $\pm$ 3.81) | 60 ( $\pm$ 3.42) | 59 ( $\pm$ 3.44) | 60 ( $\pm$ 3.42) |

RMT = resting motor threshold; AMT = active motor threshold; TS = test stimulus; SICI = short-interval intracortical interaction; SAI: short-latency afferent inhibition; CBI: cerebellar brain inhibition; motor thresholds are expressed as the mean percentage of maximum stimulator output (MSO); SEM = standard error of mean
