# Supplementary material for: Cerebellar transcranial current stimulation – An intraindividual comparison of different techniques
Source: PubMed Central journal article supplement (PMC9521312; doi:10.3389/fnins.2022.987472), 2022-09-15
Supplement: Table_2.pdf [file Table_2.pdf]

| ANOVA                                                                   | Factor                  | <i>p</i> | F        | $\eta^2_p$ |
|-------------------------------------------------------------------------|-------------------------|----------|----------|------------|
| Total<br>(Factors: INTERVENTION,<br>TIME, VELOCITY,<br>DIRECTION, HAND) | Time                    | <.001    | 20.7509  | 0.550      |
|                                                                         | Velocity                | <.001    | 93.4052  | 0.846      |
|                                                                         | Direction               | <.001    | 189.0712 | 0.918      |
|                                                                         | Time * Velocity         | <.001    | 15.5103  | 0.477      |
|                                                                         | Velocity *<br>Direction | 0.003    | 11.7077  | 0.408      |
| Right Hand<br>(Factors: INTERVENTION,<br>TIME, VELOCITY,<br>DIRECTION)  | Time                    | <.001    | 15.985   | 0.485      |
|                                                                         | Velocity                | <.001    | 82.813   | 0.830      |
|                                                                         | Direction               | <.001    | 79.236   | 0.823      |
|                                                                         | Time * Velocity         | <.001    | 11.509   | 0.404      |
| Left Hand<br>(Factors: INTERVENTION,<br>TIME, VELOCITY,<br>DIRECTION)   | Time                    | <.001    | 17.702   | 0.496      |
|                                                                         | Velocity                | <.001    | 101.910  | 0.850      |
|                                                                         | Direction               | <.001    | 177.371  | 0.908      |
|                                                                         | Time * Velocity         | <.001    | 13.363   | 0.426      |
|                                                                         | Velocity *<br>Direction | 0.002    | 13.790   | 0.434      |
| Fast Movement<br>(Factors: INTERVENTION,<br>TIME, DIRECTION, HAND)      | Time                    | <.001    | 18.448   | 0.520      |
|                                                                         | Direction               | <.001    | 82.768   | 0.830      |
| Slow Movement<br>(Factors: INTERVENTION,<br>TIME, DIRECTION, HAND)      | Time                    | <.001    | 12.503   | 0.424      |
|                                                                         | Hand                    | <.001    | 91.339   | 0.843      |
|                                                                         | Direction               | <.001    | 219.388  | 0.928      |

Supplementary Table 2: Detailed results of the ANOVAs of the standard deviation of movement trajectories. All (but only) significant results are presented.
